# Supplementary material
Source: publisher figshare collection journal article supplement (https://wiley.figshare.com/articles/dataset/_/3549894)
Supplement: Supplementary file 1 [file 1]

**R. Guimerà, D. B. Stouffer, M. Sales-Pardo, E. A. Leicht, M. E. J. Newman, and L. A. N. Amaral. 2010. Origin of compartmentalization in food webs. *Ecology* 91:2941–2951.**

# Origin of compartmentalization in food webs

(Digital Appendices)

R. Guimerà, D. B. Stouffer, M. Sales-Pardo, E. A. Leicht,  
M. E. J. Newman, and L. A. N. Amaral

## C The generalized niche model

In the niche model (Williams and Martinez, 2000), one assigns to each of  $S$  species a niche value  $n_i$  drawn from a uniform distribution in the interval  $[0, 1]$ . Each predator  $j$  preys on the species in a range  $r_j = n_j x$  of the niche axis, where  $x$  is drawn from a beta-distribution  $p(x) = \beta(1-x)^{(\beta-1)}$  and  $\beta = (S^2/2L) - 1$ , where  $L$  is the total number of trophic interactions in the network. The center of the range  $r_j$  is selected uniformly at random in the interval  $[r_j/2, n_j]$ .

The generalized niche model (Stouffer et al., 2006) builds upon this formulation by allowing for tunable prey contiguity (Fig. C1). First, a reduced range  $r'_j$  for predator  $j$  is set to  $r'_j = c r_j = c n_j x$ , where  $c$  is a fixed parameter in the interval  $[0, 1]$ . Because species are distributed uniformly at random on the resource axis, a predator  $j$  with range  $r_j$  has on average  $r_j S$  prey. The same applies to the reduced range  $r'_j$ , and therefore a predator has  $\Delta k = (r_j - r'_j) S = (1 - c) r_j S$  anticipated prey unaccounted for after the range reduction. To account for this,  $\Delta k$  prey (rounded to the nearest integer value) are selected randomly from those species  $i$  with niche value  $n_i \leq n_j$  that are not already a prey of species  $j$ . The parameter  $c$  is thus a measure of prey contiguity: for  $c = 0$  all prey of  $j$  are selected randomly among species with  $n_i \leq n_j$  and one recovers the generalized cascade model (Stouffer et al., 2005), whereas for  $c = 1$  all prey are contiguous and one recovers the niche model.

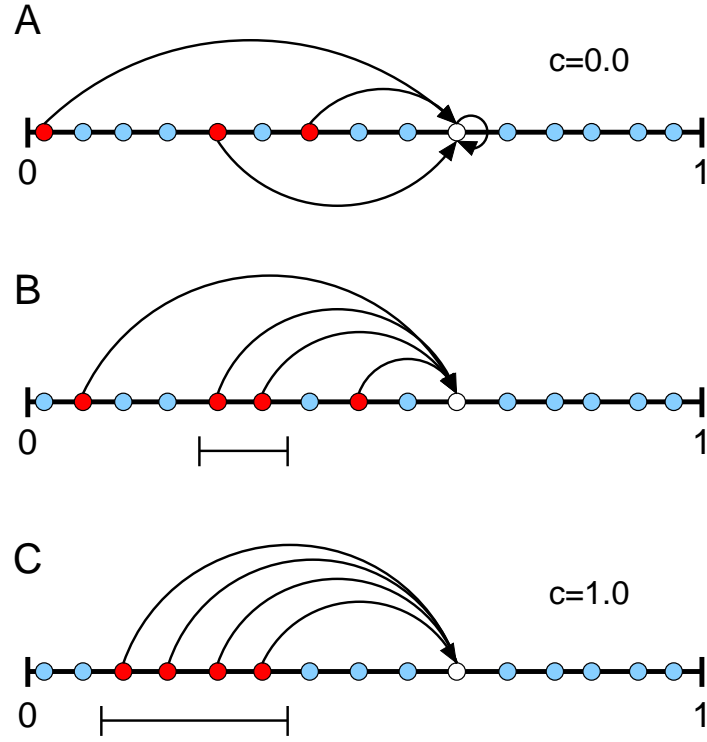

Figure C1: Graphical illustration of the generalized niche model of Stouffer et al. (2006). The circles represent the species  $i$  and their location  $n_i \in [0, 1]$  is assigned at random from a uniform distribution. We show examples of what predators' diets would resemble for various values of diet contiguity  $c$ . In all panels, the white circle represents the example predator and the red circles represent the prey. **A**, The lower limit of diet contiguity,  $c = 0$ . This limit is equivalent to the generalized cascade model of Stouffer et al. (2005). **B**, Intermediate values of diet contiguity,  $0 < c < 1$ . **C**, The upper limit of diet contiguity,  $c = 1$ . This limit is equivalent to the niche model of Williams and Martinez (2000).

## References

- Stouffer, D. B., J. Camacho, and L. A. N. Amaral. 2006. A robust measure of food web intervality. *Proc. Natl. Acad. Sci. USA* **103**:19015–19020.
- Stouffer, D. B., J. Camacho, R. Guimerà, C. A. Ng, and L. A. N. Amaral. 2005. Quantitative patterns in the structure of model and empirical food webs. *Ecology* **86**:1301–1311.
- Williams, R. J., and N. D. Martinez. 2000. Simple rules yield complex food webs. *Nature* **404**:180–183.
